1 Structures and membrane interactions of native serotonin transporter in  
2 complexes with psychostimulants

3

4 Dongxue Yang<sup>1,4</sup>, Zhiyu Zhao<sup>3</sup>, Emad Tajkhorshid<sup>3</sup>, and Eric Gouaux<sup>1,2</sup>

5

6 1. Vollum Institute, Oregon Health & Science University, Portland, Oregon 97239,  
7 USA.

8 2. Howard Hughes Medical Institute, Oregon Health & Science University, Portland,  
9 Oregon 97239, USA.

10 3. Department of Biochemistry, NIH Center for Macromolecular Modeling and  
11 Bioinformatics, Beckman Institute for Advanced Science and Technology, and Center  
12 for Biophysics and Quantitative Biology, University of Illinois at Urbana-Champaign,  
13 Urbana, IL, USA.

14 4. Present address: Department of Urology, Institute of Urology (Laboratory of  
15 Reconstructive Urology), West China Hospital, Sichuan University, Chengdu, Sichuan,  
16 China.

17 Correspondence to Eric Gouaux: [gouauxe@ohsu.edu](mailto:gouauxe@ohsu.edu)

## 18 **SUMMARY**

19           The serotonin transporter (SERT) is a member of the SLC6 neurotransmitter  
20 transporter family that mediates serotonin reuptake at presynaptic nerve terminals.  
21 SERT is the target of both therapeutic antidepressant drugs and illicit psychostimulant  
22 substances such as cocaine and methamphetamines, which are small molecules that  
23 perturb normal serotonergic transmission by interfering with serotonin transport.  
24 Despite decades of studies, the oligomerization state of native SERT (nSERT) and its  
25 interactions with potential proteins remain unresolved. Here we develop methods to  
26 isolate nSERT from porcine brain, utilize fluorescence-detection size-exclusion  
27 chromatography to investigate the nSERT oligomerization state, and report single-  
28 particle cryo-electron microscopy structures of nSERT in complexes with  
29 methamphetamine and cocaine, providing structural insights into psychostimulant  
30 recognition and accompanying nSERT conformations. Methamphetamine and cocaine  
31 both bind to SERT central site, stabilizing the transporter in outward and outward-  
32 occluded conformations, respectively. We also identify densities attributable to multiple  
33 cholesterol molecules, as well as to a potential polyunsaturated lipid bound to SERT  
34 allosteric site. Our study establishes that nSERT is best described as a monomeric entity,  
35 isolated without interacting proteins, and is ensconced by multiple cholesterol and lipid  
36 molecules.

## 37 **Introduction**

38 Serotonin is a neurotransmitter that modulates multiple fundamental brain  
39 functions that include memory, learning, sleep, pain, mood, and appetite<sup>1</sup>. The serotonin  
40 transporter (SERT) removes serotonin from synaptic, perisynaptic and extracellular  
41 regions by harnessing the energy from sodium and chloride transmembrane gradients,  
42 diminishing local serotonin concentrations and thus terminating serotonergic  
43 neurotransmission<sup>2</sup>. Congruent with the crucial roles of serotonergic signaling in  
44 neurophysiology, dysfunction of SERT has profound consequences associated with  
45 neurological disease and disorders, including Parkinson's disease, seizures, depression,  
46 epilepsy, and attention deficit hyperactivity disorder<sup>2,3</sup>.

47 SERT is a member of the large neurotransmitter transporter family, also known  
48 as neurotransmitter sodium symporters (NSSs). Additional members of the NSS family  
49 include transporters for norepinephrine (NET), dopamine (DAT), glycine (GlyT1 and  
50 GlyT2), and  $\gamma$ -aminobutyric acid (GAT), as well as for betaine and creatine<sup>2</sup>. The NSSs  
51 are made up of 12 transmembrane helices organized topologically into two inverted  
52 repeats that, in turn comprise a conserved three-dimensional fold known as the LeuT  
53 fold<sup>4</sup>. Substrate transport by NSSs is described by an alternating access mechanism<sup>5</sup> in  
54 which the substrate is translocated from extracellular to intracellular spaces<sup>6-12</sup>.

55 SERT is a longstanding pharmacological target for antidepressant drugs<sup>13</sup>, as  
56 well as for psychostimulants such as cocaine, amphetamine, and methamphetamine<sup>14</sup>.  
57 The therapeutic utility of the drugs that act on SERT, including the selective serotonin  
58 reuptake inhibitors (SSRIs), is a consequence of their specific action on SERT resulting  
59 in their relative lack of inhibition of the closely related DAT and NET transporters. By  
60 contrast, illicit, psychoactive drugs such as cocaine and amphetamines also inhibit DAT  
61 and NET, and as a consequence, they have pleotropic effects on the neurotransmitter  
62 reuptake systems, thus explaining their psychoactive and deleterious effects on  
63 neurophysiology and behavior<sup>13</sup>. The potent and widely abused psychostimulants  
64 amphetamine, methamphetamine, and cocaine as well as synthetic cocaine derivatives,  
65 competitively inhibit the transport of neurotransmitters and lock the transporter in a

66 transport inactive conformation, resulting in prolonged neurotransmission in the brain  
67 or promoting neurotransmitter efflux into the synaptic space<sup>2</sup>. The primary mechanism  
68 of addiction is thought to be increased monoamine signaling in the central nervous  
69 system. The X-ray structures of a transport-inactive *Drosophila melanogaster* DAT  
70 (dDAT) NSS transporter in complex with cocaine, amphetamine, or methamphetamine  
71 have revealed that elicit psychostimulants bind at the central substrate-binding site to  
72 the transporter, consistent with their competitive inhibition<sup>15</sup>.

73 Multiple studies suggest that SERT interacts with a variety of intracellular  
74 scaffolding, cytoskeletal, anchoring, and signaling proteins. A prominent example  
75 includes syntaxin1A, a vesicle fusion SNARE protein, which has been shown to interact  
76 directly with the amino terminus of SERT and regulate its cell surface expression level<sup>16</sup>.  
77 By contrast, a neuronal nitric-oxide synthase (nNOS) that has a postsynaptic density of  
78 95/discs-large/zona occludens (PDZ) domain interacts with the carboxy terminus of  
79 SERT, reducing its surface expression level and serotonin uptake capacity<sup>17</sup>. Hydrogen  
80 peroxide-inducible clone-5 (Hic-5) is a scaffolding protein that has been linked to SERT  
81 to aid in its internalization<sup>18</sup>. While protein-protein interactions regulate SERT function  
82 and subcellular distribution, the extent to which they form stable complexes for  
83 biochemical isolation is not well understood.

84 SERT also has cytoplasmic domains with numerous consensus sites for post-  
85 translational modification by protein kinases, phosphatases, and other interacting  
86 proteins that modulate its transporter function and cellular distribution<sup>19</sup>. SERT  
87 possesses two consensus sites for *N*-linked glycosylation within the extracellular loop  
88 2 (EL2; Asn208, Asn217) whose glycosylation is related to cell-surface expression of  
89 the transporter<sup>20</sup>. Protein kinase C (PKC) phosphorylates the cytoplasmic N- and C-  
90 terminal regions of SERT. Although no specific sites have been identified for this  
91 modification, PKC phosphorylation of SERT decreases the overall transport rate by  
92 promoting SERT redistribution from the plasma membrane to intracellular  
93 compartments<sup>21</sup>. Modification of SERT by the cGMP-stimulated protein kinase G  
94 (PKG) occurs on threonine residues, such as Thr276 (ref. 22). Interestingly, Thr276 is

95 located on the intracellular end of TM5 and is only partially exposed, thus providing  
96 insight into how its modification is coupled to the stabilization of specific  
97 conformational states<sup>22</sup>. Calcium/calmodulin-dependent protein kinase II (CaMKII)  
98 activity has been reported to regulate the electrophysiological properties of the  
99 transporter by modulating its interaction with syntaxin1A<sup>16</sup>. Tyr phosphorylation has  
100 also been shown to regulate SERT function, and 5-HT uptake capacity into platelets,  
101 which is positively correlated with Src-mediated Tyr phosphorylation<sup>23</sup>. Protein kinase  
102 A (PKA) mediated *in vitro* phosphorylation has also been reported for the isolated C-  
103 and N-terminal domains of SERT expressed as fusion proteins<sup>21</sup>. Although major efforts  
104 have been directed toward understanding the role of phosphorylation of SERT, more  
105 work is needed to understand the molecular basis of transporter regulation by  
106 phosphorylation.

107 The oligomerization states of SERT and related NSSs have been studied in the  
108 contexts of the plasma and organellar membranes<sup>24,25</sup>. Radiation inactivation and  
109 mutagenesis studies provided the first glimpse into SERT oligomerization<sup>26</sup>.  
110 Experiments with cross-linkers additionally suggested that rat SERT can form dimers  
111 and tetramers to varying degrees<sup>27</sup>. Subsequent studies investigating the  
112 oligomerization state of NSSs have employed co-immunoprecipitation<sup>28-30</sup>, Förster  
113 resonance energy transfer (FRET) measurements<sup>30-36</sup>, and fluorescence lifetime  
114 imaging microscopy<sup>35</sup>. Many of these studies were interpreted with an oligomerization  
115 model where the transporters form a variety of quaternary arrangements, ranging from  
116 monomers to multimers, differing to some extent depending on the specific NSSs<sup>33,35,37-</sup>  
117 <sup>39</sup>. Membrane components such as phosphatidylinositol 4,5-bisphosphate (PIP2) and  
118 other lipids also have been implicated in the formation of NSS oligomers<sup>40,41</sup>,  
119 presumably via lipid interactions to the transmembrane part of the protein, while  
120 psychostimulants such as methamphetamine and amphetamine have been shown to  
121 influence transporter oligomerization through an unknown mechanism<sup>34,42,43</sup>.

122 Despite extensive experimental data from a broad range of biochemical,  
123 biophysical and computational studies<sup>44,45</sup> that have been interpreted in terms of SERT

124 oligomers, there has been no direct evidence for its oligomerization state based on the  
125 purified transporter isolated from a native source. Here, we develop methods to extract  
126 nSERT from porcine brain tissue using the high-affinity 15B8 Fab, in the presence of  
127 methamphetamine and cocaine, respectively, allowing us to study the purified complex  
128 using fluorescence-detection size-exclusion chromatography (FSEC). We then carry  
129 out high-resolution, single-particle cryo-electron microscopy (cryo-EM)  
130 reconstructions, together with computational studies, to probe the conformation of  
131 psychostimulant-bound transporter and its interaction with lipids of a native cell  
132 membrane.

## 133 **Results**

### 134 **Purification and cryo-EM of the native transporter**

135 To isolate nSERT, we exploited the 15B8 Fab<sup>10</sup>, an antibody fragment that binds  
136 to a tertiary epitope of human SERT (hSERT), yet does not hinder the binding of ligands  
137 or the transport activity. We hypothesized that because porcine SERT and hSERT are  
138 closely related in amino acid sequence, the 15B8 Fab would also bind to porcine SERT  
139 and could serve as a powerful tool for immunoaffinity isolation of the transporter. We  
140 thus engineered the 15B8 Fab with a carboxy terminal mCherry fluorophore and an  
141 affinity tag ([Fig. 1a](#)).

142 To isolate nSERT from porcine brain membranes, we next explored a wide  
143 range of membrane protein solubilization conditions, aiming to extract the transporter  
144 under the mildest conditions while retaining as much surrounding native lipid as  
145 possible. We thus first attempted solubilization in the presence of styrene-maleic acid  
146 (SMA) co-polymer<sup>46</sup> or recently developed amphipols<sup>47</sup>. Unfortunately, neither yielded  
147 a measurable amount of nSERT as shown by FSEC analysis ([Fig. 1b](#)). We then  
148 examined the classical non ionic detergents, n-dodecyl- $\beta$ -D-maltoside (DDM) together  
149 with cholesterol hemisuccinate (CHS) or digitonin, based on their utility in extraction  
150 of recombinant SERT<sup>10</sup>. Surprisingly, a peak for the SERT-15B8 Fab-mCherry complex  
151 was only observed for the DDM/CHS mixture ([Fig. 1b](#)). We therefore utilized

152 DDM/CHS in all subsequent studies. To isolate the nSERT from porcine brain tissue,  
153 we incubated the solubilized membranes with an excess of the 15B8 Fab-mCherry  
154 protein, as well as with saturating concentrations of either methamphetamine or cocaine.  
155 The transporter was purified by affinity chromatography, followed by FSEC and the  
156 manual collection of fractions (Fig. 1c). Analysis of the isolated material by western  
157 blot revealed a band migrating with an apparent mass of 75kDa (Fig. 1d), consistent  
158 with the estimated mass of nSERT. The well-resolved and symmetrical FSEC peak  
159 indicated that the purified nSERT 15B8 Fab-mCherry complex was monodisperse. The  
160 elution volume with FSEC of nSERT 15B8 Fab complex was consistent with the  
161 recombinant ts2-15B8 complex (Fig. 1c), indicating the purified nSERT was a  
162 monomer.

163 To explore the function of nSERT, we carried out saturation binding  
164 experiments using the high-affinity SSRI [<sup>3</sup>H]paroxetine and determined a dissociation  
165 constant ( $K_d$ ) of  $6.5 \pm 1.3$  nM (Fig. 1e), consistent with previous measurements<sup>8</sup>. To  
166 characterize methamphetamine and cocaine binding with nSERT, we next performed  
167 competition experiments, similarly employing [<sup>3</sup>H]paroxetine, and measured inhibitory  
168 constants ( $K_i$ ) of  $199 \pm 103.4$   $\mu$ M (Fig. 1f) and  $179 \pm 68$  nM (Fig. 1g), respectively, thus  
169 indicating that both methamphetamine and cocaine compete for [<sup>3</sup>H]paroxetine binding,  
170 consistent with the psychostimulants binding to the central site. The potency of  
171 methamphetamine and cocaine on nSERT differs by a factor of  $\sim 1,000$ , in accord with  
172 previous studies, whereas the two ligands are equally potent on DAT<sup>48</sup>, underscoring  
173 the differences in residue composition and plasticity of the central binding pockets of  
174 SERT and DAT. Taken together, the ligand binding data illustrate that our purification  
175 method yields native transporter fully active in ligand binding.

176 From one pig brain we obtained  $\sim 20$   $\mu$ g of purified protein in a volume of 200  
177  $\mu$ L, which was sufficient for visualizing particles on continuous carbon-coated grids  
178 under cryogenic conditions. We then collected single-particle cryo-EM data sets and  
179 carried out reconstructions of the methamphetamine- and cocaine-bound SERT  
180 complexes, obtaining density maps that extended to approximately 2.9 and 3.3  $\text{\AA}$

181 resolutions, respectively (Supplementary Fig. 1-5 and Supplementary Table 1,  
182 Supplemental Fig. 6a-b). Thorough 2D and 3D classifications yielded a single class for  
183 each data set in which nSERT is found as a monomeric entity, with no evidence of  
184 dimers or higher ordered oligomers (Supplementary Fig. 1-2), consistent with the  
185 molecular size of SERT estimated by FSEC. Overall, the density maps are of sufficient  
186 quality to assign most of the amino acid side chains, identify additional non-protein  
187 density within the central binding site for bound ligands, and indicate the presence of  
188 bound CHS molecules surrounding the transporter transmembrane domains (Fig. 2).

### 189 Psychostimulant occupancy of the central site

190 Methamphetamine binds to the central site of the nSERT complex, adopting a  
191 similar binding pose to that observed in DAT<sup>15</sup>, lodged between the aromatic groups of  
192 Tyr213 and Tyr132. The amino groups of methamphetamine interact with Ser475 and  
193 form hydrogen bonds with the carboxylate of Asp135, and the main chain carbonyl of  
194 Phe372, as seen with the hydrogen bonds formed between the amino group of  
195 methamphetamine, and the equivalent Asp46 residue, and Phe319 residue in DAT<sup>15</sup>  
196 (PDB code: 4XP6). The side chain of Phe378 forms edge-to-face aromatic interactions  
197 with the phenyl group of methamphetamine (Fig. 3a, Supplementary Fig. 6c).  
198 Comparison of the positions of TM1, TM6, and the extracellular gate to the equivalent  
199 elements of serotonin-bound, outward-open SERT complex<sup>49</sup> (Protein Data Bank (PDB)  
200 code: 7LIA, RMSD: 0.606 Å), indicates that SERT-15B8 Fab-methamphetamine  
201 complex adopts an outward-open conformation (Fig. 3b, Supplementary Fig. 6d),  
202 which is consistent with previous structural studies of dDAT in complex with  
203 methamphetamine<sup>15</sup>.

204 The structure of the SERT-cocaine complex displays an outward-occluded  
205 conformation, with cocaine occupying the entire central binding pocket with an overall  
206 similar pose to the dDAT-cocaine complex<sup>15</sup>. The nearly complete filling of the volume  
207 of the central site by cocaine perhaps accounts for the higher affinity of SERT for  
208 cocaine compared with methamphetamine, reminiscent of how increasing the volume  
209 of serotonin via methylated analogs can enhance ligand binding<sup>49</sup>. The benzoyl moiety



210 of cocaine is accommodated between TM3 and TM8, where it forms van der Waals  
211 interactions with Ile209, Tyr213, Phe378, and Thr476. The methyl ester group  
212 protrudes into the base of the extracellular vestibule and the tropane rings are bordered  
213 by Tyr132, Ala133, Asp135, Phe372, and Ser475. Interestingly, the side chain of  
214 Phe372 undergoes substantial displacement and moves further into the central site than  
215 seen in the dDAT complex<sup>15</sup>. This reorganization translates into the closure of the inner  
216 gate from the extracellular side, blocking the release of cocaine from the central site  
217 and ultimately occluding the binding pocket, a conformation that was not seen in the  
218 cocaine-bound dDAT structure (Fig. 3c, Supplementary Fig. 6e). The overall structure  
219 of SERT-15B8 Fab-cocaine complex is similar to 5-HT bound recombinant hSERT in  
220 its outward open structure (PDB code: 7LIA, RMSD: 0.623), except for the orientation  
221 of Phe372. Because the rotation of Phe372 closes the extracellular gate, we define the  
222 conformation of the SERT-15B8 Fab-cocaine complex as an outward-occluded state  
223 (Fig. 3d, Supplementary Fig.6f).

224 Taken together, the structures of SERT in complexes with methamphetamine  
225 and cocaine show how the shape, chemical composition, and plasticity of the binding  
226 site enables the transporter to recognize ligands of different shapes and sizes. The  
227 distinct orientations of Phe372 in the cocaine-bound nSERT and recombinant dDAT  
228 structures emphasize the role of the central site residues in defining ligand binding  
229 affinity, which can be expanded to understanding variations in the pharmacological  
230 profiles between biogenic amine transporters.

### 231 **CHS sites surround the TMD**

232 SERT is an integral membrane protein embedded in a complex neuronal  
233 membrane composed of phospholipids, sphingolipids, and cholesterol<sup>50</sup>. SERT<sup>50-52</sup>,  
234 NET<sup>53,54</sup>, DAT<sup>55-57</sup>, and GlyT<sup>58,59</sup>, as well as some excitatory amino acid transporters<sup>60</sup>  
235 associate with cholesterol in brain tissues or in transfected cell lines. Cholesterol is  
236 implicated in a variety of biological processes, including membrane protein  
237 organization and compartmentalization within the membrane. It is also known to play  
238 a key indirect role in modulating neurotransmission via its effects on the activities of

239 DAT<sup>61</sup> and SERT<sup>50</sup>. Indeed, depletion of cholesterol from membranes affects the  
240 function of neurotransmitter transporters<sup>61,62</sup>. Previous molecular dynamics (MD)  
241 studies revealed six potential cholesterol binding sites in SERT, defined as CHOL1-6<sup>63</sup>.  
242 Bound CHOL has been observed at the CHOL1 binding site in dDAT structures<sup>15</sup>. The  
243 cholesterol analog, cholesteryl hemisuccinate (CHS), has been found to bind at the  
244 CHOL2 binding site in dDAT<sup>15,64</sup>, as well as to hSERT<sup>10</sup>, and CHS has also been  
245 observed at the CHOL3 binding site in hSERT<sup>8</sup>. In investigating the interactions of  
246 CHOL with nSERT, we carefully examined the density maps of methamphetamine- and  
247 cocaine-bound SERT complexes, and the quality of the density maps enabled the  
248 identification of CHS at the CHOL1 and CHOL2 binding sites in both of the structures  
249 (Fig. 4a-b, d-e), consistent with previous observations.

250 We also identified a non-protein density in the allosteric site for both complexes  
251 (Fig. 2), a binding site for a broad spectrum of ligands<sup>8,49,65</sup> (Supplementary Fig. 6g-i).  
252 The overall shape of the density resembles a lipid molecule. Because the local  
253 resolutions of the density maps within the allosteric site are not sufficient for  
254 unambiguous molecular identification, we used molecular dynamics (MD) simulations  
255 to examine the binding of the most abundant lipid molecules, steroids, or fatty acids to  
256 the allosteric site. We performed all-atom MD simulations of the cocaine-SERT  
257 complex with the allosteric site occupied by either docosahexaenoic acid (DHA), in  
258 charged or neutral forms (DHA<sup>-</sup> or DHA<sup>0</sup>, respectively), CHOL, or CHS, in triplicate  
259 for each lipid species. In all three independent simulations, DHA<sup>-</sup> remained bound at  
260 the site (center-of-mass displacement  $\leq 3$  Å), whereas in all simulations with neutral  
261 DHA<sup>0</sup>, CHOL, or CHS, the ligand unbinds from its binding site within nanoseconds, as  
262 highlighted by large center-of-mass displacements ( $> 5$  Å) (Fig. 4g, Supplementary Fig.  
263 7a). We further performed bias-exchange umbrella sampling simulations to calculate  
264 binding free energy profiles for DHA<sup>-</sup> and CHOL, verifying preferential binding of  
265 DHA<sup>-</sup> to the allosteric site, whereas CHOL binding to this site appears to be  
266 accompanied with a large penalty in free energy (Fig. 4h, Supplementary Fig. 7b-c).  
267 This suggests the allosteric site is not a preferred cholesterol-binding site and instead

268 accommodates fatty acid binding. We thus fit DHA into this site (Fig. 4c and f). The  
269 DHA molecule adopts a curled orientation, with the flexible fatty acid tail protruding  
270 between TM11 and TM12, and the carboxylate group extending into the extracellular  
271 vestibule (Fig. 4c and f). The role of lipid binding within the allosteric site awaits further  
272 elucidation.

## 273 Discussion

274 Despite indirect experimental results suggesting that monoamine transporters  
275 might form oligomeric quaternary complexes<sup>25</sup>, there is no direct determination of the  
276 oligomerization state for these proteins using purified native transporters isolated under  
277 mild conditions. In this study, we used immunoaffinity purification to isolate the native  
278 porcine SERT, proceeding to solve its cryo-EM structure in complex with the 15B8 Fab.  
279 Together with FSEC data, we show that nSERT is best described as a monomer rather  
280 than as a dimer or a multimer (Fig. 1-2). Previous biochemical studies suggested that  
281 transmembrane helix (TM) 11 and TM12 form oligomeric interfaces in hSERT, and  
282 also suggested potential contributions by TM5 and TM6 (ref.32). By contrast, the x-ray  
283 structure of SERT indicates that the kinked TM12 and the additional C-terminal helix  
284 protruding into the membrane preclude dimerization of SERT via a LeuT-like, TM12  
285 interface<sup>4</sup>. Furthermore, subsequent structural studies revealed that TM5 and TM6 are  
286 directly involved in the transporter's conformational transitions between different  
287 functional states, and thus we speculate that their required flexibility is likely to  
288 incompatible with the formation of dimers or multimers. Thus, our findings provide  
289 support for monomeric SERT in its native environment. Nevertheless, our study does  
290 not exclude the possibility of dimeric or multimeric arrangements present in the native  
291 membrane, perhaps the loss of lipids, such as PIP2, during extraction with detergent  
292 results in an exclusively monomeric transporter. Thus, further studies are needed to  
293 address the roles that membrane constituents may play in oligomer formation.

294 Previous structural studies of dDAT complexed with methamphetamine,  
295 cocaine, or their analogs provided a structural framework for showing how addictive  
296 psychostimulants stabilize the transporter in an outward-open conformation<sup>15</sup>. Here, we

297 employed native SERT and single particle cryo-EM to study amphetamine and cocaine  
298 binding. We find that compared to the corresponding dDAT structures,  
299 methamphetamine and cocaine have similar binding site locations and interactions at  
300 the central site of SERT. There are differences in the transporter conformations,  
301 however, with cocaine inducing an outward-occluded conformation of SERT, caused  
302 by Phe372 rotating ‘inward’, to cover the tropane ring of cocaine, thereby blocking the  
303 release of the ligand from the central site, a conformational change not seen in the  
304 transport inactive, cocaine-bound dDAT structures (Fig. 3).

305 CHOL is an important constituent of eukaryotic plasma membranes and  
306 modulates the function of neurotransmitter transporters. It is required for optimal  
307 reconstitution of the GABA transporter<sup>66</sup> and is implicated in the function of SERT<sup>50</sup>  
308 via direct CHOL-protein interactions, as well as in the activity of DAT<sup>57,61</sup>, NET<sup>53,54</sup>,  
309 and GlyT2<sup>58</sup>. In the case of SERT, CHOL modulates its functional properties by  
310 enhancing substrate transport and antagonist binding<sup>50</sup>. MD simulations show that  
311 CHOL molecules are embedded in multiple sites of SERT<sup>63</sup>, three of which have been  
312 confirmed by structural studies<sup>8,10,15,64</sup>. Here we discovered two CHOL binding sites in  
313 nSERT. In addition, we also observed a non-protein density in the serotonin allosteric  
314 site (Fig. 4). Although this region of TM10, TM11, and TM12 has been indicated to be  
315 a potential CHOL-binding site, our MD simulations suggest that CHOL cannot stably  
316 bind within this site. We instead find that DHA is well accommodated into the  
317 experimental density, and is stably bound as determined by MD simulations and free  
318 energy calculations. Conclusive determination of the native lipid molecules that bind to  
319 the allosteric site, in addition to DHA, awaits further study.

320 Using biochemical analysis and cryo-EM, we observed under conditions of mild  
321 non-ionic detergents, the native, mammalian nSERT is isolated as a monomeric species,  
322 without interacting proteins, yet bound with multiple CHOL and lipid molecules.  
323 Nevertheless, the data presented in this study do not completely exclude the possibility  
324 of SERT oligomers in the native membrane. We investigated amphetamine and cocaine  
325 binding to nSERT and discovered that both ligands occupy the central site, where they

326 are involved in numerous interactions with surrounding residues. Our studies of native  
327 SERT, in complex with addictive drugs provides a strategy for the study of native  
328 monoamine transporters. In summary, the nSERT complexes demonstrate the  
329 mechanism of psychostimulant inhibition and shed light onto the modulation of NSSs  
330 by illicit substances and the interactions of lipids with the transmembrane domain,  
331 particularly within the allosteric binding site.

## 332 **Methods**

### 333 **Antibody purification**

334 The 15B8 Fab construct<sup>8</sup> was cloned into the pFastBac-dual vector, including  
335 a GP64 signal sequence. A mCherry tag, followed by a twin Strep  
336 [TrpSerHisProGlnPheGluLys(GlyGlyGlySer)2GlyGlySerAlaTrpSerHisProGlnPheGlu  
337 Lys] and a His<sub>10</sub> purification tag, were fused to the C-terminus of the heavy chain.  
338 Baculovirus was prepared according to standard methods. The Sf9 cells were infected  
339 by the recombinant baculovirus at a cell density of  $2 \times 10^6$  ml<sup>-1</sup> at 27 °C. The culture  
340 supernatant was then collected 96 h after infection by centrifugation at 5,000 rpm for  
341 20 min using a JLA 8.1000 rotor at 4 °C. The 15B8 Fab was purified from Sf9  
342 supernatant by metal ion affinity chromatography followed by size exclusion  
343 chromatography.

### 344 **Isolation of nSERT**

345 One pig brain (~150 g) was homogenized with a Dounce homogenizer in ice-  
346 cold Tris-buffered saline buffer (TBS; 20 mM Tris-HCl, pH 8.0, 150 mM NaCl)  
347 supplemented with 1 mM PMSF, 0.8 μM aprotinin, 2 μg ml<sup>-1</sup> leupeptin, and 2 μM  
348 pepstatin. The homogenized brain suspension was then sonicated using a sonicator  
349 equipped with a tip size of 1.27 cm, for 15 min with 3 s on and 5 s off, at medium power,  
350 on ice. The resulting solution was then clarified by centrifugation for 20 min at 10,000g  
351 at 4 °C, the supernatant was collected and applied for further centrifugation at 40,000  
352 rpm for 1 h at 4 °C (45 Ti fixed-angle rotor, Beckman) to pellet the membranes. The  
353 membranes were resuspended in 40 ml ice-cold TBS and further homogenized with a  
354 Dounce homogenizer. The membranes were solubilized in 100 ml ice-cold TBS  
355 containing 20 mM n-dodecyl-β-D-maltoside (DDM) and 2.5 mM cholesteryl  
356 hemisuccinate (CHS) in the presence of 1 mg of 15B8 Fab, 100 μM methamphetamine  
357 or 10 μM cocaine, for 1 h at 4°C. The lysate was centrifuged at 40,000 rpm for 50 min  
358 at 4°C (45 Ti fixed-angle rotor, Beckman) and the transporter-Fab complex was isolated  
359 by affinity chromatography using Strep-Tactin resin. The complex was further purified

360 by fluorescence detection size exclusion chromatography (FSEC)<sup>67</sup> on a Superose 6  
361 Increase 10/300 column in a buffer composed of 20 mM Tris-HCl (pH 8) supplemented  
362 with 100 mM NaCl, 1 mM DDM, 0.2 mM CHS, and 100  $\mu$ M methamphetamine or 10  
363  $\mu$ M cocaine. The peak fraction containing the nSERT-Fab complexes was collected and  
364 used for biochemical and single particle cryo-EM analysis.

### 365 **Western blot analysis**

366 Purified nSERT was run on a SDS-PAGE gel and subsequently transferred to a  
367 nitrocellulose membrane. Antibodies used for detection were 10F2, a monoclonal  
368 antibody generated in house, and which can recognize the linear epitope of SERT. An  
369 IRDye 680RD anti-mouse secondary antibody (LI-COR), was used for visualization.  
370 Blots were developed from the secondary antibody at a ratio of 1:10,000 and imaged  
371 by Odyssey® DLx Imaging System.

### 372 **Radioligand binding assay**

373 A saturation binding experiment using [<sup>3</sup>H]paroxetine was performed via the  
374 scintillation proximity assay (SPA)<sup>68</sup> using the lysate of pig brain membranes in SPA  
375 buffer (20 mM Tris-HCl, pH 8, 100 mM NaCl, 1 mM DDM, 0.2 mM CHS). The  
376 membrane lysates were mixed with Cu-YSi beads (0.5 mg ml<sup>-1</sup>) in SPA buffer, and  
377 [<sup>3</sup>H]paroxetine at a concentration of 0.3 to 40 nM. Nonspecific binding was estimated  
378 by experiments that included 100  $\mu$ M cold S-citalopram. Data were analyzed using a  
379 single-site binding function.

380 Methamphetamine and cocaine competition binding experiments were  
381 performed using SPA with Cu-YSi beads (0.5 mg ml<sup>-1</sup>) in SPA buffer. For the  
382 methamphetamine competition assays, SPA was performed with Strep-purified nSERT,  
383 10 nM [<sup>3</sup>H]paroxetine, and 1  $\mu$ M to 100 mM cold methamphetamine. For the cocaine  
384 competition assays, SPA was done with Strep-purified nSERT and 10 nM  
385 [<sup>3</sup>H]paroxetine in the presence of 1 nM to 1 mM cold cocaine. Experiments were  
386 performed in triplicate. The error bars for each data point represent the standard error  
387 of the mean (SEM). K<sub>i</sub> values were determined with the Cheng-Prusoff equation<sup>69</sup> in

388 GraphPad Prism.

### 389 **Cryo-EM sample preparation and data acquisition**

390 The purified nSERT-15B8 Fab complex was concentrated to 0.1 mg ml<sup>-1</sup>, after  
391 which either 10 mM methamphetamine or 1 mM cocaine, together with 100 μM  
392 fluorinated n-octyl-β-D-maltoside (final concentration) were added prior to grid  
393 preparation. A droplet of 2.5 μl of protein solution was applied to glow-discharged  
394 Quantifoil 200 or 300 mesh 2/1 or 1.2/1.3 gold grids covered by 2 nm of continuous  
395 carbon film. The grids were blotted for 2.0 s at 100% humidity at 20°C, followed by  
396 plunging into liquid ethane cooled by liquid nitrogen, using a Vitrobot Mark IV. The  
397 nSERT datasets were collected on a 300 kV FEI Titan Krios microscope located at the  
398 HHMI Janelia Research Campus, equipped with a K3 detector, at a nominal  
399 magnification of 105,000x, corresponding to a pixel size of 0.831 Å. The typical  
400 defocus values ranged from -1.0 to -2.5 μm. Each stack was exposed for 4.0 s and dose-  
401 fractionated into 60 frames, with a total dose of 60 e<sup>-</sup> Å<sup>-2</sup>. Images were recorded using  
402 the automated acquisition program SerialEM<sup>70</sup>.

### 403 **Cryo-EM image processing**

404 The beam-induced motion was corrected by MotionCor2 (ref.71). The defocus  
405 values were estimated by Gctf<sup>72</sup> and particles were picked by blob-picker in  
406 cryoSPARC<sup>73</sup>. After two rounds of 2D classification, 2D classes with clear secondary  
407 structures were selected. An initial model was then generated by cryoSPARC. The  
408 initial model was further used for the following heterogeneous refinement. A round of  
409 3D classification without image alignment was performed in RELION-3.1 (ref.74),  
410 with a soft mask excluding the constant domain of 15B8 Fab and micelle. The selected  
411 particles were imported back to cryoSPARC for homogeneous refinement, local  
412 contrast transfer function (CTF) refinement, and nonuniform refinement. The local  
413 resolution of the final map was estimated in cryoSPARC.

414 For the nSERT-15B8 Fab complex in the presence of (+)-methamphetamine,  
415 7,794,907 particles were picked in cryoSPARC, which after rounds of 2D classification



416 and heterogeneous refinement, left 348,745 particles (binned to a 200-pixel box, 1.662  
417 Å pixel<sup>-1</sup>). Particles were reextracted (360-pixel box, 0.831 Å pixel<sup>-1</sup>) and subjected for  
418 homogeneous refinement and nonuniform refinement in cryoSPARC, then subjected to  
419 3D classification with 10 classes in RELION-3.1 without image alignment (360-pixel  
420 box, 0.831 Å pixel<sup>-1</sup>). Particles from three classes with clear TM features were  
421 combined and subjected to homogeneous refinement, local CTF refinement, and  
422 nonuniform refinement in cryoSPARC, respectively (Supplementary Fig. 2).

423 For the nSERT-15B8 Fab complex with cocaine, a total of 7,560,137 particles  
424 were picked from 16,094 movies in cryoSPARC with a box size of 200 pixels (1.662 Å  
425 pixel<sup>-1</sup>). After rounds of 2D classification and heterogeneous refinement, 338,343  
426 particles were selected, re-extracted (400-pixel box, 0.831 Å pixel<sup>-1</sup>), and subjected to  
427 homogeneous refinement, nonuniform refinement in cryoSPARC, and further subjected  
428 to 3D classification with 10 classes in RELION-3.1 without image alignment. Two  
429 well-resolved classes with 243,207 particles were combined and further refined in  
430 cryoSPARC with homogeneous refinement, local CTF refinement, and nonuniform  
431 refinement (Supplementary Fig. 3).

### 432 **Model building and refinement**

433 Interpretation of the cryo-EM maps exploited rigid-body fitting of the SERT-  
434 antibody complex models derived from previous cryo-EM studies. The outward-open  
435 ΔN72/C13 SERT-15B8 Fab complex with a 5-HT model (PDB code: 7LIA) was used  
436 as a reference. The initial model was generated via rigid-body fitting of the homology  
437 models to the density map in UCSF ChimeraX<sup>75</sup>. The model was then manually  
438 adjusted in Coot<sup>76</sup>. The model was further refined using real-space refinement in  
439 PHENIX<sup>77</sup>. Figures were prepared in UCSF ChimeraX.

### 440 **System preparation for MD simulations**

441 We performed molecular dynamics (MD) simulations of the cocaine-SERT  
442 complex in a hydrated lipid bilayer to explore the identity of the ligand in the allosteric  
443 site ligand. Triplicates of four simulation systems were studied, with the allosteric site

444 occupied by either docosahexaenoic acid (DHA) in charged or neutral forms (DHA<sup>-</sup> or  
445 DHA<sup>0</sup>, respectively), cholesterol (CHOL), or cholesteryl hemisuccinate (CHS). The  
446 initial coordinates of CHS and DHA<sup>-</sup> were transferred from experimental modeling,  
447 while CHOL was constructed into the CHS model, and DHA<sup>0</sup> was constructed by  
448 protonating the DHA<sup>-</sup> model using the PSFGEN plugin in VMD<sup>78</sup>. The missing side  
449 chains and hydrogen atoms in the protein were added using the PSFGEN plugin in  
450 VMD<sup>78</sup>. The co-crystallized antibody fragment was removed. All bound Na<sup>+</sup> and Cl<sup>-</sup>  
451 ions, the cocaine molecule, and the two CHOL molecules bound to transmembrane  
452 helices were retained. The allosteric site residue Phe532 was converted to the  
453 corresponding tyrosine in wildtype hSERT. Glu173 was modeled as a protonated side  
454 chain according to pKa calculations using PROPKA 3.0 (ref. 79). A disulfide bond was  
455 introduced between Cys237 and Cys246. Neutral N-terminal and C-terminal ‘caps’  
456 were added to the first and last residue of the protein segment, respectively. All protein  
457 models were internally hydrated using the DOWSER plugin<sup>80,81</sup> of VMD and externally  
458 solvated using the SOLVATE program<sup>82</sup>. The models were then oriented according to  
459 the Orientations of Proteins in Membranes (OPM) database<sup>83</sup> and embedded in a lipid  
460 bilayer composed of 218 1-palmitoyl-2-oleoyl-sn-glycero-3-phosphocholine (POPC)  
461 and 94 CHOL molecules from CHARMM-GUI<sup>84</sup>. The systems were next solvated and  
462 neutralized with a 150 mM NaCl aqueous solution in VMD<sup>78</sup>, resulting in simulation  
463 systems of ~160,000 atoms, with approximate dimensions of 112 Å × 112 Å × 120 Å  
464 before equilibration. Each simulation system was replicated into three independent  
465 copies with lipid distributions randomized by shuffling lipid molecules within each  
466 leaflet using the VMD plugin Membrane Mixer<sup>85</sup>.

### 467 **Equilibrium MD simulations**

468 All simulations were performed using NAMD2<sup>86,87</sup> and the CHARMM36m  
469 force fields<sup>87</sup> for proteins, CHARMM36 force fields for lipids (including CHS, CHOL,  
470 DHA<sup>-</sup> and DHA<sup>0</sup>)<sup>88</sup>, and the TIP3P model for water<sup>89</sup>, along with the NBFIX  
471 modifications for non-bonded interactions<sup>90,91</sup>. The force field parameters for cocaine  
472 were obtained from the CGenFF server<sup>92</sup>. All simulations were carried out as

473 isothermal-isobaric (NPT) ensembles under periodic boundary conditions and  
474 simulated in a flexible cell, whose dimensions could change independently while  
475 keeping a constant ratio in the xy (membrane) plane. A constant temperature of 310 K  
476 was maintained using Langevin dynamics with a  $1.0\text{-ps}^{-1}$  damping coefficient, and a  
477 constant pressure of 1.01325 bar was maintained with the Langevin piston Nosé-  
478 Hoover method<sup>93</sup>. Non-bonded interactions were calculated in a pairwise manner with  
479 the 12-Å cut-off, and a switching function applied between 10 Å and 12 Å. Long-range,  
480 non-bonded interactions were calculated with the particle mesh Ewald (PME) method<sup>94</sup>.  
481 Bond lengths involving hydrogen atoms were constrained using the SHAKE<sup>95</sup> and  
482 SETTLE algorithms<sup>96</sup>. Simulations were integrated in 2-fs time steps, and trajectories  
483 were recorded every 10 ps.

484 The four simulation systems, each replicated into three independent copies were  
485 simulated following these steps: (1) 3,000 steps of energy minimization; (2) 15 ns of  
486 MD equilibration, during which C $\alpha$  atoms, non-hydrogen atoms of ligands, and all  
487 bound ions were restrained by harmonic potentials with decreasing force constants ( $k$   
488 = 5, 2.5, 1 kcal mol<sup>-1</sup> Å<sup>-2</sup> for 5 ns each) to allow for protein side chain relaxation and  
489 protein hydration; (3) 150 ns production MD run, during which harmonic potentials ( $k$   
490 = 1 kcal mol<sup>-1</sup> Å<sup>-2</sup> for 5 ns each) were applied to only C $\alpha$  atoms to avoid undesired  
491 protein conformational deviation but allowing free diffusion of the allosteric site ligand.

## 492 **Free energy characterization of ligand binding**

493 The bias-exchange umbrella sampling (BEUS) method<sup>97</sup> was employed to  
494 characterize the binding energy profiles of CHOL and DHA<sup>-</sup> to the allosteric site. The  
495 ligand-TM1b/TM6a distance, measured as the center-of-mass distance between the  
496 non-hydrogen atoms in the ligand and C $\alpha$  atoms in the extracellular ends of TM1b and  
497 TM6a (residues 145-148 and 361-364), was chosen as the reaction coordinate to sample  
498 ligand binding. The initial distances for the modeled CHOL and DHA<sup>-</sup> were 17.2 and  
499 15.2 Å, respectively. We chose reaction coordinates ranging from 14 to 21.5 Å and 15  
500 to 22.5 Å for CHOL and DHA<sup>-</sup>, respectively, to sample ligands unbinding from the  
501 allosteric site. Each reaction coordinate was divided into 16 windows with a spacing of

502 0.5 Å. The initial conformations in each window were captured from steered MD  
503 simulations using the COLVAR module<sup>98</sup> in NAMD, in which the ligand was pulled  
504 towards the desired distances using a harmonic potential ( $k = 10 \text{ kcal mol}^{-1} \text{ Å}^{-2}$ ) moving  
505 at a  $0.5 \text{ Å ns}^{-1}$  rate. The BEUS simulations were performed for 60 ns in each window.  
506 The Hamiltonian replica exchange was attempted every 1 ps between neighboring  
507 windows. Weighted Histogram Analysis Method (WHAM)<sup>99,100</sup> was used to construct  
508 the free energy profiles and perform error analysis using the Monte Carlo bootstrapping  
509 method.

### 510 **Data availability**

511 The 3D cryo-EM density maps and molecular coordinates have been deposited  
512 in the Electron Microscopy Data Bank (EMDB) and Protein Data Bank (PDB) for the  
513 SERT-15B8-Fab-methamphetamine outward (EMD-27384; 8DE4) and SERT-15B8-  
514 Fab-cocaine outward-occluded (EMD-27383; 8DE3) reconstructions and structures,  
515 respectively.

### 516 **Acknowledgments**

517 We thank Rui Yan at the HHMI Janelia CryoEM Facility for help in microscope  
518 operation and data collection. A portion of this research was supported by NIH grant  
519 U24GM129547 and performed at the PNCC at OHSU and accessed through EMSL  
520 (grid.436923.9), a DOE Office of Science User Facility sponsored by the Office of  
521 Biological and Environmental Research. Simulations in this study have been performed  
522 using allocations at National Science Foundation Supercomputing Centers (XSEDE  
523 grant MCA06N060). This work was otherwise funded by the NIH (R01 MH070039  
524 and P41 GM104601). E.G. is supported by Jennifer and Bernard LaCroute and is an  
525 investigator of the Howard Hughes Medical Institute.

### 526 **Author contributions**

527 D.Y. and E.G. designed the project. D.Y. performed all the experiments. D.Y. and E.G.  
528 wrote the manuscript. Z.Z. and E.T. performed molecular dynamics simulations, and

529 wrote sections related to computational methods. All authors contributed to editing and  
530 manuscript preparation.

531 **Competing interests**

532 The authors declare no competing interests.

533 **References**

- 534 1 Berger, M., Gray, J. A. & Roth, B. L. The expanded biology of serotonin. *Annu.*  
535 *Rev. Med.* **60**, 355-366, doi:10.1146/annurev.med.60.042307.110802 (2009).
- 536 2 Kristensen, A. S. *et al.* SLC6 neurotransmitter transporters: structure, function,  
537 and regulation. *Pharmacol. Rev.* **63**, 585-640, doi:10.1124/pr.108.000869  
538 (2011).
- 539 3 Broer, S. & Gether, U. The solute carrier 6 family of transporters. *Br. J.*  
540 *Pharmacol.* **167**, 256-278, doi:10.1111/j.1476-5381.2012.01975.x (2012).
- 541 4 Yamashita, A., Singh, S. K., Kawate, T., Jin, Y. & Gouaux, E. Crystal structure  
542 of a bacterial homologue of Na<sup>+</sup>/Cl<sup>-</sup>-dependent neurotransmitter transporters.  
543 *Nature* **437**, 215-223, doi:10.1038/nature03978 (2005).
- 544 5 Mitchell, P. A general theory of membrane transport from studies of bacteria.  
545 *Nature* **180**, 134-136, doi:10.1038/180134a0 (1957).
- 546 6 Penmatsa, A. & Gouaux, E. How LeuT shapes our understanding of the  
547 mechanisms of sodium-coupled neurotransmitter transporters. *J. Physiol.* **592**,  
548 863-869, doi:10.1113/jphysiol.2013.259051 (2014).
- 549 7 Malinauskaite, L. *et al.* A mechanism for intracellular release of Na<sup>+</sup> by  
550 neurotransmitter/sodium symporters. *Nat. Struct. Mol. Biol.* **21**, 1006-1012,  
551 doi:10.1038/nsmb.2894 (2014).
- 552 8 Coleman, J. A., Green, E. M. & Gouaux, E. X-ray structures and mechanism of  
553 the human serotonin transporter. *Nature* **532**, 334-339,  
554 doi:10.1038/nature17629 (2016).
- 555 9 Coleman, J. A. & Gouaux, E. Structural basis for recognition of diverse  
556 antidepressants by the human serotonin transporter. *Nat. Struct. Mol. Biol.* **25**,  
557 170-175, doi:10.1038/s41594-018-0026-8 (2018).
- 558 10 Coleman, J. A. *et al.* Serotonin transporter-ibogaine complexes illuminate  
559 mechanisms of inhibition and transport. *Nature* **569**, 141-145,  
560 doi:10.1038/s41586-019-1135-1 (2019).
- 561 11 Coleman, J. A. *et al.* Chemical and structural investigation of the paroxetine-  
562 human serotonin transporter complex. *Elife* **9**, doi:10.7554/eLife.56427 (2020).

- 563 12 Shavsavar, A. *et al.* Structural insights into the inhibition of glycine reuptake.  
564 *Nature*, doi:10.1038/s41586-021-03274-z (2021).
- 565 13 Andersen, J., Kristensen, A. S., Bang-Andersen, B. & Stromgaard, K. Recent  
566 advances in the understanding of the interaction of antidepressant drugs with  
567 serotonin and norepinephrine transporters. *Chem. Commun. (Camb.)*, 3677-  
568 3692, doi:10.1039/b903035m (2009).
- 569 14 Howell, L. L. & Kimmel, H. L. Monoamine transporters and psychostimulant  
570 addiction. *Biochem. Pharmacol.* **75**, 196-217, doi:10.1016/j.bcp.2007.08.003  
571 (2008).
- 572 15 Wang, K. H., Penmatsa, A. & Gouaux, E. Neurotransmitter and psychostimulant  
573 recognition by the dopamine transporter. *Nature* **521**, 322-327,  
574 doi:10.1038/nature14431 (2015).
- 575 16 Quick, M. W. Role of syntaxin 1A on serotonin transporter expression in  
576 developing thalamocortical neurons. *Int. J. Dev. Neurosci.* **20**, 219-224,  
577 doi:10.1016/s0736-5748(02)00021-7 (2002).
- 578 17 Chanrion, B. *et al.* Physical interaction between the serotonin transporter and  
579 neuronal nitric oxide synthase underlies reciprocal modulation of their activity.  
580 *Proc. Natl. Acad. Sci. U. S. A.* **104**, 8119-8124, doi:10.1073/pnas.0610964104  
581 (2007).
- 582 18 Carneiro, A. M. & Blakely, R. D. Serotonin-, protein kinase C-, and Hic-5-  
583 associated redistribution of the platelet serotonin transporter. *J. Biol. Chem.* **281**,  
584 24769-24780, doi:10.1074/jbc.M603877200 (2006).
- 585 19 Eriksen, J., Jorgensen, T. N. & Gether, U. Regulation of dopamine transporter  
586 function by protein-protein interactions: new discoveries and methodological  
587 challenges. *J. Neurochem.* **113**, 27-41, doi:10.1111/j.1471-4159.2010.06599.x  
588 (2010).
- 589 20 Rasmussen, T. N., Plenge, P., Bay, T., Egebjerg, J. & Gether, U. A single  
590 nucleotide polymorphism in the human serotonin transporter introduces a new  
591 site for N-linked glycosylation. *Neuropharmacology* **57**, 287-294,  
592 doi:10.1016/j.neuropharm.2009.05.009 (2009).

- 593 21 Blakely, R. D. *et al.* Regulated phosphorylation and trafficking of  
594 antidepressant-sensitive serotonin transporter proteins. *Biol. Psychiatry* **44**,  
595 169-178, doi:10.1016/s0006-3223(98)00124-3 (1998).
- 596 22 Ramamoorthy, S., Samuvel, D. J., Buck, E. R., Rudnick, G. & Jayanthi, L. D.  
597 Phosphorylation of threonine residue 276 is required for acute regulation of  
598 serotonin transporter by cyclic GMP. *J. Biol. Chem.* **282**, 11639-11647,  
599 doi:10.1074/jbc.M611353200 (2007).
- 600 23 Zarpellon, A. *et al.* Serotonin (5-HT) transport in human platelets is modulated  
601 by Src-catalysed Tyr-phosphorylation of the plasma membrane transporter  
602 SERT. *Cell. Physiol. Biochem.* **21**, 87-94, doi:10.1159/000113750 (2008).
- 603 24 Sitte, H. H. & Freissmuth, M. Oligomer formation by Na<sup>+</sup>-Cl<sup>-</sup>-coupled  
604 neurotransmitter transporters. *Eur. J. Pharmacol.* **479**, 229-236,  
605 doi:10.1016/j.ejphar.2003.08.072 (2003).
- 606 25 Sitte, H. H., Farhan, H. & Javitch, J. A. Sodium-dependent neurotransmitter  
607 transporters: oligomerization as a determinant of transporter function and  
608 trafficking. *Mol. Interv.* **4**, 38-47, doi:10.1124/mi.4.1.38 (2004).
- 609 26 Mellerup, E. T., Plenge, P. & Nielsen, M. Size determination of binding  
610 polymers for [3H]imipramine and [3H]paroxetine in human platelet membranes.  
611 *Eur. J. Pharmacol.* **106**, 411-413, doi:10.1016/0014-2999(84)90730-1 (1984).
- 612 27 Jess, U., Betz, H. & Schloss, P. The membrane-bound rat serotonin transporter,  
613 SERT1, is an oligomeric protein. *FEBS Lett.* **394**, 44-46, doi:10.1016/0014-  
614 5793(96)00916-7 (1996).
- 615 28 Kilic, F. & Rudnick, G. Oligomerization of serotonin transporter and its  
616 functional consequences. *Proc. Natl. Acad. Sci. U. S. A.* **97**, 3106-3111,  
617 doi:10.1073/pnas.060408997 (2000).
- 618 29 Kocabas, A. M., Rudnick, G. & Kilic, F. Functional consequences of homo- but  
619 not hetero-oligomerization between transporters for the biogenic amine  
620 neurotransmitters. *J. Neurochem.* **85**, 1513-1520, doi:10.1046/j.1471-  
621 4159.2003.01793.x (2003).
- 622 30 Torres, G. E. *et al.* Oligomerization and trafficking of the human dopamine



- 623 transporter. Mutational analysis identifies critical domains important for the  
624 functional expression of the transporter. *J. Biol. Chem.* **278**, 2731-2739,  
625 doi:10.1074/jbc.M201926200 (2003).
- 626 31 Schmid, J. A. *et al.* Oligomerization of the human serotonin transporter and of  
627 the rat GABA transporter 1 visualized by fluorescence resonance energy  
628 transfer microscopy in living cells. *J. Biol. Chem.* **276**, 3805-3810,  
629 doi:10.1074/jbc.M007357200 (2001).
- 630 32 Just, H., Sitte, H. H., Schmid, J. A., Freissmuth, M. & Kudlacek, O.  
631 Identification of an additional interaction domain in transmembrane domains 11  
632 and 12 that supports oligomer formation in the human serotonin transporter. *J.*  
633 *Biol. Chem.* **279**, 6650-6657, doi:10.1074/jbc.M306092200 (2004).
- 634 33 Bartholomaeus, I. *et al.* Glycine transporter dimers: evidence for occurrence in  
635 the plasma membrane. *J. Biol. Chem.* **283**, 10978-10991,  
636 doi:10.1074/jbc.M800622200 (2008).
- 637 34 Chen, N. & Reith, M. E. Substrates dissociate dopamine transporter oligomers.  
638 *J. Neurochem.* **105**, 910-920, doi:10.1111/j.1471-4159.2007.05195.x (2008).
- 639 35 Fjorback, A. W. *et al.* Serotonin transporter oligomerization documented in  
640 RN46A cells and neurons by sensitized acceptor emission FRET and  
641 fluorescence lifetime imaging microscopy. *Biochem. Biophys. Res. Commun.*  
642 **380**, 724-728, doi:10.1016/j.bbrc.2009.01.128 (2009).
- 643 36 Li, Y., Cheng, S. Y., Chen, N. & Reith, M. E. Interrelation of dopamine  
644 transporter oligomerization and surface presence as studied with mutant  
645 transporter proteins and amphetamine. *J. Neurochem.* **114**, 873-885,  
646 doi:10.1111/j.1471-4159.2010.06818.x (2010).
- 647 37 Hastrup, H., Karlin, A. & Javitch, J. A. Symmetrical dimer of the human  
648 dopamine transporter revealed by cross-linking Cys-306 at the extracellular end  
649 of the sixth transmembrane segment. *Proc. Natl. Acad. Sci. U. S. A.* **98**, 10055-  
650 10060, doi:10.1073/pnas.181344298 (2001).
- 651 38 Hastrup, H., Sen, N. & Javitch, J. A. The human dopamine transporter forms a  
652 tetramer in the plasma membrane: cross-linking of a cysteine in the fourth

- 653 transmembrane segment is sensitive to cocaine analogs. *J. Biol. Chem.* **278**,  
654 45045-45048, doi:10.1074/jbc.C300349200 (2003).
- 655 39 Horiuchi, M. *et al.* Surface-localized glycine transporters 1 and 2 function as  
656 monomeric proteins in *Xenopus* oocytes. *Proc. Natl. Acad. Sci. U. S. A.* **98**,  
657 1448-1453, doi:10.1073/pnas.041329498 (2001).
- 658 40 Jayaraman, K. *et al.* Dopamine transporter oligomerization involves the scaffold  
659 domain, but spares the bundle domain. *PLoS Comput. Biol.* **14**, e1006229,  
660 doi:10.1371/journal.pcbi.1006229 (2018).
- 661 41 Anderluh, A. *et al.* Direct PIP2 binding mediates stable oligomer formation of  
662 the serotonin transporter. *Nat Commun* **8**, 14089, doi:10.1038/ncomms14089  
663 (2017).
- 664 42 Baucum, A. J., 2nd, Rau, K. S., Riddle, E. L., Hanson, G. R. & Fleckenstein, A.  
665 E. Methamphetamine increases dopamine transporter higher molecular weight  
666 complex formation via a dopamine- and hyperthermia-associated mechanism. *J.*  
667 *Neurosci.* **24**, 3436-3443, doi:10.1523/JNEUROSCI.0387-04.2004 (2004).
- 668 43 Siciliano, C. A. *et al.* Amphetamine Reverses Escalated Cocaine Intake via  
669 Restoration of Dopamine Transporter Conformation. *J. Neurosci.* **38**, 484-497,  
670 doi:10.1523/JNEUROSCI.2604-17.2017 (2018).
- 671 44 Javanainen, M., Martinez-Seara, H. & Vattulainen, I. Excessive aggregation of  
672 membrane proteins in the Martini model. *PLoS One* **12**, e0187936,  
673 doi:10.1371/journal.pone.0187936 (2017).
- 674 45 Periole, X., Zeppelin, T. & Schiott, B. Dimer Interface of the Human Serotonin  
675 Transporter and Effect of the Membrane Composition. *Sci. Rep.* **8**, 5080,  
676 doi:10.1038/s41598-018-22912-7 (2018).
- 677 46 Lee, S. C. *et al.* A method for detergent-free isolation of membrane proteins in  
678 their local lipid environment. *Nat. Protoc.* **11**, 1149-1162,  
679 doi:10.1038/nprot.2016.070 (2016).
- 680 47 Tribet, C., Audebert, R. & Popot, J. L. Amphipols: polymers that keep  
681 membrane proteins soluble in aqueous solutions. *Proc. Natl. Acad. Sci. U. S. A.*  
682 **93**, 15047-15050, doi:10.1073/pnas.93.26.15047 (1996).

- 683 48 Docherty, J. R. & Alsufyani, H. A. Pharmacology of Drugs Used as Stimulants.  
684 *J. Clin. Pharmacol.* **61 Suppl 2**, S53-S69, doi:10.1002/jcph.1918 (2021).
- 685 49 Yang, D. & Gouaux, E. Illumination of serotonin transporter mechanism and  
686 role of the allosteric site. *Sci Adv* **7**, eabl3857, doi:10.1126/sciadv.abl3857  
687 (2021).
- 688 50 Laursen, L. *et al.* Cholesterol binding to a conserved site modulates the  
689 conformation, pharmacology, and transport kinetics of the human serotonin  
690 transporter. *J. Biol. Chem.* **293**, 3510-3523, doi:10.1074/jbc.M117.809046  
691 (2018).
- 692 51 Magnani, F., Tate, C. G., Wynne, S., Williams, C. & Haase, J. Partitioning of  
693 the serotonin transporter into lipid microdomains modulates transport of  
694 serotonin. *J. Biol. Chem.* **279**, 38770-38778, doi:10.1074/jbc.M400831200  
695 (2004).
- 696 52 Scanlon, S. M., Williams, D. C. & Schloss, P. Membrane cholesterol modulates  
697 serotonin transporter activity. *Biochemistry* **40**, 10507-10513,  
698 doi:10.1021/bi010730z (2001).
- 699 53 Jayanthi, L. D., Samuvel, D. J. & Ramamoorthy, S. Regulated internalization  
700 and phosphorylation of the native norepinephrine transporter in response to  
701 phorbol esters. Evidence for localization in lipid rafts and lipid raft-mediated  
702 internalization. *J. Biol. Chem.* **279**, 19315-19326, doi:10.1074/jbc.M311172200  
703 (2004).
- 704 54 Arapulisamy, O., Mannangatti, P. & Jayanthi, L. D. Regulated norepinephrine  
705 transporter interaction with the neurokinin-1 receptor establishes transporter  
706 subcellular localization. *J. Biol. Chem.* **288**, 28599-28610,  
707 doi:10.1074/jbc.M113.472878 (2013).
- 708 55 Adkins, E. M. *et al.* Membrane mobility and microdomain association of the  
709 dopamine transporter studied with fluorescence correlation spectroscopy and  
710 fluorescence recovery after photobleaching. *Biochemistry* **46**, 10484-10497,  
711 doi:10.1021/bi700429z (2007).
- 712 56 Foster, J. D., Adkins, S. D., Lever, J. R. & Vaughan, R. A. Phorbol ester induced

- 713 trafficking-independent regulation and enhanced phosphorylation of the  
714 dopamine transporter associated with membrane rafts and cholesterol. *J.*  
715 *Neurochem.* **105**, 1683-1699, doi:10.1111/j.1471-4159.2008.05262.x (2008).
- 716 57 Hong, W. C. & Amara, S. G. Membrane cholesterol modulates the outward  
717 facing conformation of the dopamine transporter and alters cocaine binding. *J.*  
718 *Biol. Chem.* **285**, 32616-32626, doi:10.1074/jbc.M110.150565 (2010).
- 719 58 Nunez, E., Alonso-Torres, P., Fornes, A., Aragon, C. & Lopez-Corcuera, B. The  
720 neuronal glycine transporter GLYT2 associates with membrane rafts: functional  
721 modulation by lipid environment. *J. Neurochem.* **105**, 2080-2090,  
722 doi:10.1111/j.1471-4159.2008.05292.x (2008).
- 723 59 Liu, X., Mitrovic, A. D. & Vandenberg, R. J. Glycine transporter 1 associates  
724 with cholesterol-rich membrane raft microdomains. *Biochem. Biophys. Res.*  
725 *Commun.* **384**, 530-534, doi:10.1016/j.bbrc.2009.05.014 (2009).
- 726 60 Butchbach, M. E., Tian, G., Guo, H. & Lin, C. L. Association of excitatory  
727 amino acid transporters, especially EAAT2, with cholesterol-rich lipid raft  
728 microdomains: importance for excitatory amino acid transporter localization  
729 and function. *J. Biol. Chem.* **279**, 34388-34396, doi:10.1074/jbc.M403938200  
730 (2004).
- 731 61 Jones, K. T., Zhen, J. & Reith, M. E. Importance of cholesterol in dopamine  
732 transporter function. *J. Neurochem.* **123**, 700-715, doi:10.1111/jnc.12007  
733 (2012).
- 734 62 Deveau, C. M., Rodriguez, E., Schroering, A. & Yamamoto, B. K. Serotonin  
735 transporter regulation by cholesterol-independent lipid signaling. *Biochem.*  
736 *Pharmacol.* **183**, 114349, doi:10.1016/j.bcp.2020.114349 (2021).
- 737 63 Ferraro, M., Masetti, M., Recanatini, M., Cavalli, A. & Bottegoni, G. Mapping  
738 Cholesterol Interaction Sites on Serotonin Transporter through Coarse-Grained  
739 Molecular Dynamics. *PLoS One* **11**, e0166196,  
740 doi:10.1371/journal.pone.0166196 (2016).
- 741 64 Penmatsa, A., Wang, K. H. & Gouaux, E. X-ray structure of dopamine  
742 transporter elucidates antidepressant mechanism. *Nature* **503**, 85-90,

- 743 doi:10.1038/nature12533 (2013).
- 744 65 Plenge, P., Yang D.Y., Salomon K., Laursen, L., Newman, A.H., Gouaux, E.,  
745 Coleman, J.A., Loland, C.J. The antidepressant drug vilazodone is an allosteric  
746 inhibitor of the serotonin transporter. *Nat. Commun.* **12**, 5063 (2021).
- 747 66 Shouffani, A., IKanner, B. Cholesterol is required for the reconstruction of the  
748 sodium- and chloride-coupled, gamma-aminobutyric acid transporter from rat  
749 brain. *J. Biol. Chem.* **265** (1990).
- 750 67 Kawate, T. & Gouaux, E. Fluorescence-detection size-exclusion  
751 chromatography for precrystallization screening of integral membrane proteins.  
752 *Structure* **14**, 673-681, doi:10.1016/j.str.2006.01.013 (2006).
- 753 68 Cook, N., Harris, A., Hopkins, A. & Hughes, K. Scintillation proximity assay  
754 (SPA) technology to study biomolecular interactions. *Curr Protoc Protein Sci*  
755 **Chapter 19**, Unit 19 18, doi:10.1002/0471140864.ps1908s27 (2002).
- 756 69 Cheng, Y. & Prusoff, W. H. Relationship between the inhibition constant (K<sub>I</sub>)  
757 and the concentration of inhibitor which causes 50 per cent inhibition (I<sub>50</sub>) of  
758 an enzymatic reaction. *Biochem. Pharmacol.* **22**, 3099-3108 (1973).
- 759 70 Mastronarde, D. N. Automated electron microscope tomography using robust  
760 prediction of specimen movements. *J. Struct. Biol.* **152**, 36-51,  
761 doi:10.1016/j.jsb.2005.07.007 (2005).
- 762 71 Zheng, S. Q. *et al.* MotionCor2: anisotropic correction of beam-induced motion  
763 for improved cryo-electron microscopy. *Nat. Methods* **14**, 331-332,  
764 doi:10.1038/nmeth.4193 (2017).
- 765 72 Zhang, K. Gctf: Real-time CTF determination and correction. *J. Struct. Biol.*  
766 **193**, 1-12, doi:10.1016/j.jsb.2015.11.003 (2016).
- 767 73 Punjani, A., Rubinstein, J. L., Fleet, D. J. & Brubaker, M. A. cryoSPARC:  
768 algorithms for rapid unsupervised cryo-EM structure determination. *Nat.*  
769 *Methods* **14**, 290-296, doi:10.1038/nmeth.4169 (2017).
- 770 74 Scheres, S. H. RELION: implementation of a Bayesian approach to cryo-EM  
771 structure determination. *J. Struct. Biol.* **180**, 519-530,  
772 doi:10.1016/j.jsb.2012.09.006 (2012).

- 773 75 Pettersen, E. F. *et al.* UCSF ChimeraX: Structure visualization for researchers,  
774 educators, and developers. *Protein Sci.* **30**, 70-82, doi:10.1002/pro.3943 (2021).
- 775 76 Emsley, P. & Cowtan, K. Coot: model-building tools for molecular graphics.  
776 *Acta Crystallogr. D Biol. Crystallogr.* **60**, 2126-2132,  
777 doi:10.1107/S0907444904019158 (2004).
- 778 77 Adams, P. D. *et al.* PHENIX: a comprehensive Python-based system for  
779 macromolecular structure solution. *Acta Crystallogr. D Biol. Crystallogr.* **66**,  
780 213-221, doi:10.1107/S0907444909052925 (2010).
- 781 78 Humphrey, W., Dalke, A. & Schulten, K. VMD: visual molecular dynamics. *J.*  
782 *Mol. Graph.* **14**, 33-38, 27-38, doi:10.1016/0263-7855(96)00018-5 (1996).
- 783 79 Olsson, M. H., Sondergaard, C. R., Rostkowski, M. & Jensen, J. H. PROPKA3:  
784 Consistent Treatment of Internal and Surface Residues in Empirical pKa  
785 Predictions. *J. Chem. Theory Comput.* **7**, 525-537, doi:10.1021/ct100578z  
786 (2011).
- 787 80 Zhang, L. & Hermans, J. Hydrophilicity of cavities in proteins. *Proteins* **24**,  
788 433-438, doi:10.1002/(SICI)1097-0134(199604)24:4<433::AID-  
789 PROT3>3.0.CO;2-F (1996).
- 790 81 Gumbart, J., Trabuco, L. G., Schreiner, E., Villa, E. & Schulten, K. Regulation  
791 of the protein-conducting channel by a bound ribosome. *Structure* **17**, 1453-  
792 1464, doi:10.1016/j.str.2009.09.010 (2009).
- 793 82 Helmut Grubmüller. Solvate 1 .0, 1996.  
794 <https://www.mpinat.mpg.de/grubmueller/solvate>.
- 795 83 Lomize, M. A., Pogozheva, I. D., Joo, H., Mosberg, H. I. & Lomize, A. L. OPM  
796 database and PPM web server: resources for positioning of proteins in  
797 membranes. *Nucleic Acids Res.* **40**, D370-376, doi:10.1093/nar/gkr703 (2012).
- 798 84 Jo, S., Kim, T., Iyer, V. G. & Im, W. CHARMM-GUI: a web-based graphical  
799 user interface for CHARMM. *J. Comput. Chem.* **29**, 1859-1865,  
800 doi:10.1002/jcc.20945 (2008).
- 801 85 Licari, G., Dehghani-Ghahnaviyeh, S. & Tajkhorshid, E. Membrane Mixer: A  
802 Toolkit for Efficient Shuffling of Lipids in Heterogeneous Biological

- 803 Membranes. *J. Chem. Inf. Model.* **62**, 986-996, doi:10.1021/acs.jcim.1c01388  
804 (2022).
- 805 86 Phillips, J. C. *et al.* Scalable molecular dynamics with NAMD. *J. Comput. Chem.*  
806 **26**, 1781-1802, doi:10.1002/jcc.20289 (2005).
- 807 87 Huang, J. *et al.* CHARMM36m: an improved force field for folded and  
808 intrinsically disordered proteins. *Nat. Methods* **14**, 71-73,  
809 doi:10.1038/nmeth.4067 (2017).
- 810 88 Klauda, J. B. *et al.* Update of the CHARMM all-atom additive force field for  
811 lipids: validation on six lipid types. *J. Phys. Chem. B* **114**, 7830-7843,  
812 doi:10.1021/jp101759q (2010).
- 813 89 Jorgensen, W. L. C., J.; Madura, D.; Comparison of simple potential functions  
814 for simulating liquid water. *J. Chem. Phys.* **79**,  
815 doi:https://doi.org/10.1063/1.445869 (1983).
- 816 90 Yoo, J. A., A.; Improved Parametrization of Li<sup>+</sup>, Na<sup>+</sup>, K<sup>+</sup>, and Mg<sup>2+</sup> Ions for  
817 All-Atom Molecular Dynamics Simulations of Nucleic Acid Systems. *J. Phys.*  
818 *Chem. Lett.* **3**, 45-50 (2011).
- 819 91 Yoo, J. & Aksimentiev, A. New tricks for old dogs: improving the accuracy of  
820 biomolecular force fields by pair-specific corrections to non-bonded  
821 interactions. *Phys. Chem. Chem. Phys.* **20**, 8432-8449,  
822 doi:10.1039/C7CP08185E (2018).
- 823 92 Vanommeslaeghe, K. *et al.* CHARMM general force field: A force field for  
824 drug-like molecules compatible with the CHARMM all-atom additive  
825 biological force fields. *J. Comput. Chem.* **31**, 671-690, doi:10.1002/jcc.21367  
826 (2010).
- 827 93 Martyna, G. J. Constant pressure molecular dynamics algorithms. *J. Chem. Phys.*  
828 **101**, 4177, doi:https://doi.org/10.1063/1.467468 (1994).
- 829 94 Darden, T. Y., D.; Pedersen, L.; Particle mesh Ewald: An N·log(N) method  
830 for Ewald sums in large systems. *J. Chem. Phys.* **98**,  
831 doi:https://doi.org/10.1063/1.464397 (1993).



- 832 95 Ryckaert, J. P. C., G.; Berendsen, H.J.C; . Numerical integration of the cartesian  
833 equations of motion of a system with constraints: molecular dynamics of n-  
834 alkanes. *Journal of Computational Physics* **23**, 327-341,  
835 doi:[https://doi.org/10.1016/0021-9991\(77\)90098-5](https://doi.org/10.1016/0021-9991(77)90098-5) (1977).
- 836 96 Miyamoto, S. K., P. A.;. Settle: An analytical version of the SHAKE and  
837 RATTLE algorithm for rigid water models. *Journal of Computational*  
838 *Chemistry* **13**, 952-962, doi: <https://doi.org/10.1002/jcc.540130805> (1992).
- 839 97 Sugita, Y. Multidimensional replica-exchange method for free-energy  
840 calculations. *J. Chem. Phys.* **113**, doi:<https://doi.org/10.1063/1.1308516> (2000).
- 841 98 Fiorin, G. K., M. L.; Hénin, J. Using collective variables to drive molecular  
842 dynamics simulations. *Mol. Phys.* **111**,  
843 doi:<https://doi.org/10.1080/00268976.2013.813594> (2013).
- 844 99 Kumar, S. R., J. M.; Bouzida, D.; Swendsen, R. H.; Kollman, P. A. THE  
845 weighted histogram analysis method for free-energy calculations on  
846 biomolecules. I. The method. *J. Comput. Chem.* **13**, 1011-1021, doi:  
847 <https://doi.org/10.1002/jcc.540130812> (1992).
- 848 100 Grossfield, Alan, “WHAM: the weighted histogram analysis method”, version  
849 2.1.11, [http://membrane.urmc.rochester.edu/wordpress/?page\\_id=126](http://membrane.urmc.rochester.edu/wordpress/?page_id=126).



850 **Figure legends**

851 **Fig. 1 Purification and biochemical analysis of native SERT (nSERT).** **a** Flow chart  
852 for nSERT purification. **b** FSEC profiles for screening of solubilization conditions. **c**  
853 Representative FSEC profile for nSERT in complex with the 15B8 Fab. **d** Western blot  
854 analysis of isolated nSERT after FSEC. The experiments were repeated two times with  
855 similar results. **e** Saturation binding of [<sup>3</sup>H] paroxetine to nSERT. **f** Competition binding  
856 of (+)-methamphetamine with [<sup>3</sup>H]paroxetine for nSERT. Symbols show the mean  
857 values derived from n=3 technical replicates. Error bars show the SEM. **g** Plots of  
858 competition binding of cocaine against [<sup>3</sup>H]paroxetine for nSERT. Data are means ±  
859 SEM.

860 **Fig. 2 The cryo-EM structure of nSERT in complex with (+)-methamphetamine or**  
861 **cocaine, respectively.** **a** Overall structure of the (+)-methamphetamine complex in the  
862 outward-open conformation, shown in cartoon representation. **b** Cartoon representation  
863 of the cocaine complex in the outward-occluded conformation. (+)-methamphetamine,  
864 cocaine, cholesteryl hemisuccinate (CHS), and docosahexaenoic acid (DHA) are shown  
865 in space-filling representations.

866 **Fig. 3 Ligands occupy the central site.** **a** Close-up view of (+)-methamphetamine in  
867 the binding pocket with hydrogen bonds shown as dashed lines. **b** Slice view of nSERT  
868 in complex with (+)-methamphetamine. **c** Cocaine interactions within the central  
869 binding site. A hydrogen bond between cocaine and D135 is indicated with a dashed  
870 line. **d** Slab views of the extracellular cavity of nSERT in complex with cocaine.

871 **Fig. 4 Cholesteryl hemisuccinate (CHS) and docosahexaenoic acid (DHA) binding**  
872 **in SERT.** **a** and **d** Close-up views of CHS modeled at the junction of TM1, TM5, and  
873 TM7 interacting with multiple hydrophobic residues. **b** and **e**, CHS modeled at the  
874 junction of TM2, TM7, and TM11. **c** and **f**, DHA modeled at the allosteric site. **g** Time  
875 series of displacements of ligands modeled at the allosteric site during the MD  
876 simulation. DHA<sup>-</sup>, DHA<sup>0</sup>, CHOL, and CHS trajectories are plotted in green, purple,  
877 blue, and orange, respectively, and are shown for three independent simulations in each

878 case. Plots are smoothed using a sliding window of 1 ns. **h** Free energy profiles of DHA<sup>-</sup>  
879 and CHOL binding to the allosteric site along the ligand-TM1b/TM6a distance, with  
880 molecular images showing DHA<sup>-</sup> in the allosteric site (left) or dissociated into the  
881 membrane (middle). The ligand-TM1b/TM6a distance is measured as the center-of-  
882 mass distance between heavy atoms in the ligand (shown in VDW representation) and  
883 C $\alpha$  atoms from TM1b and TM6a (residues 145-148 and 361-364, shown as pink  
884 spheres).

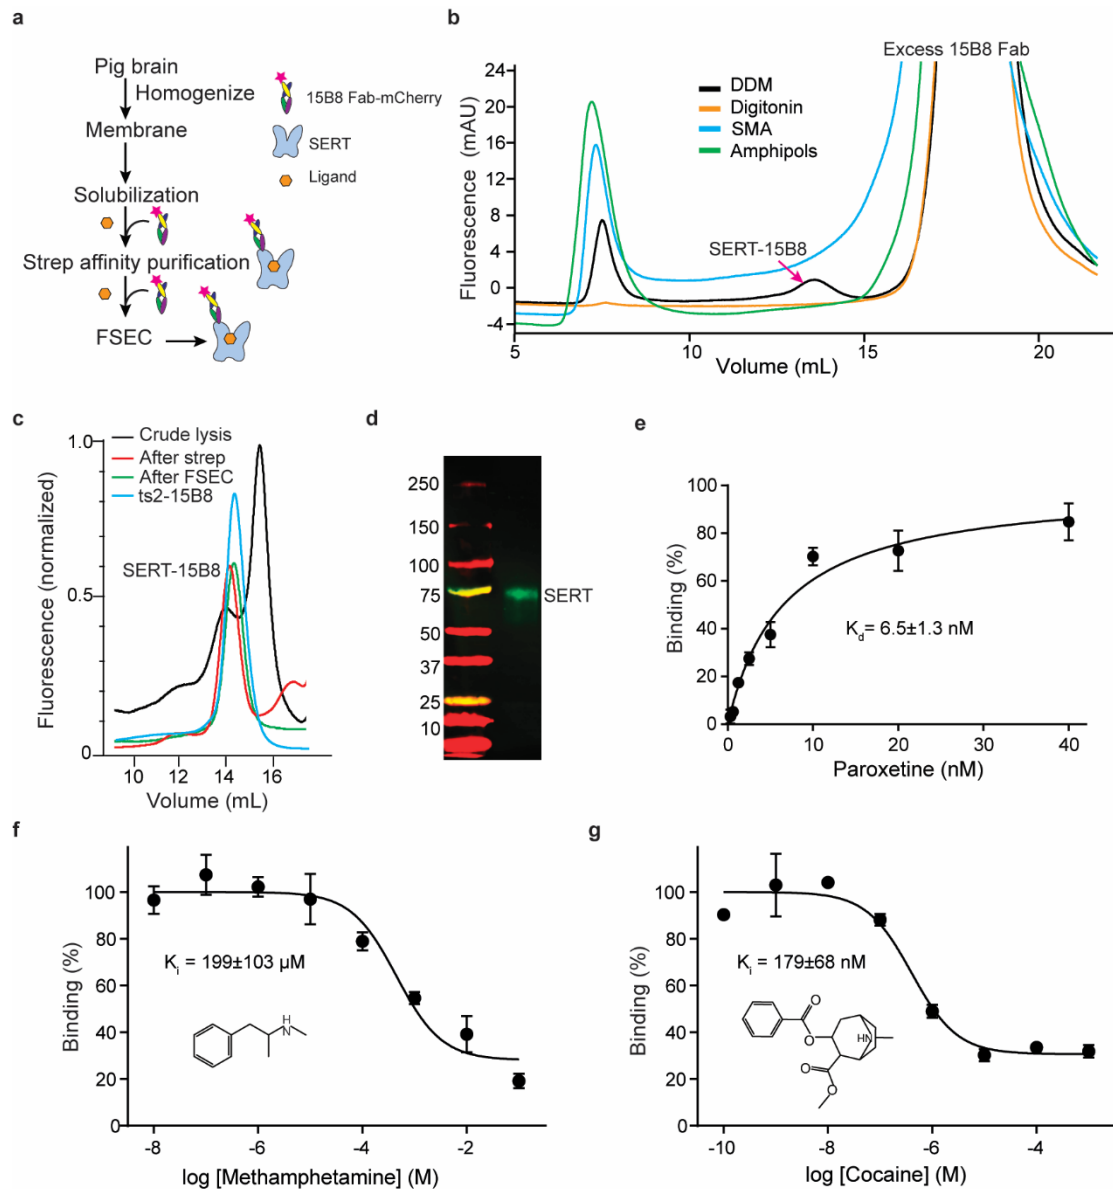

886 **Fig. 1 Purification and biochemical analysis of native SERT (nSERT).** **a** Flow chart  
887 for nSERT purification. **b** FSEC profiles for screening of solubilization conditions. **c**  
888 Representative FSEC profile for nSERT in complex with the 15B8 Fab. **d** Western blot  
889 analysis of isolated nSERT after FSEC. The experiments were repeated two times with  
890 similar results. **e** Saturation binding of [<sup>3</sup>H] paroxetine to nSERT. **f** Competition binding  
891 of (+)-methamphetamine with [<sup>3</sup>H]paroxetine for nSERT. Symbols show the mean  
892 values derived from n = 3 technical replicates. Error bars show the SEM. **g** Plots of  
893 competition binding of cocaine against [<sup>3</sup>H]paroxetine for nSERT. Data are means  $\pm$   
894 SEM.

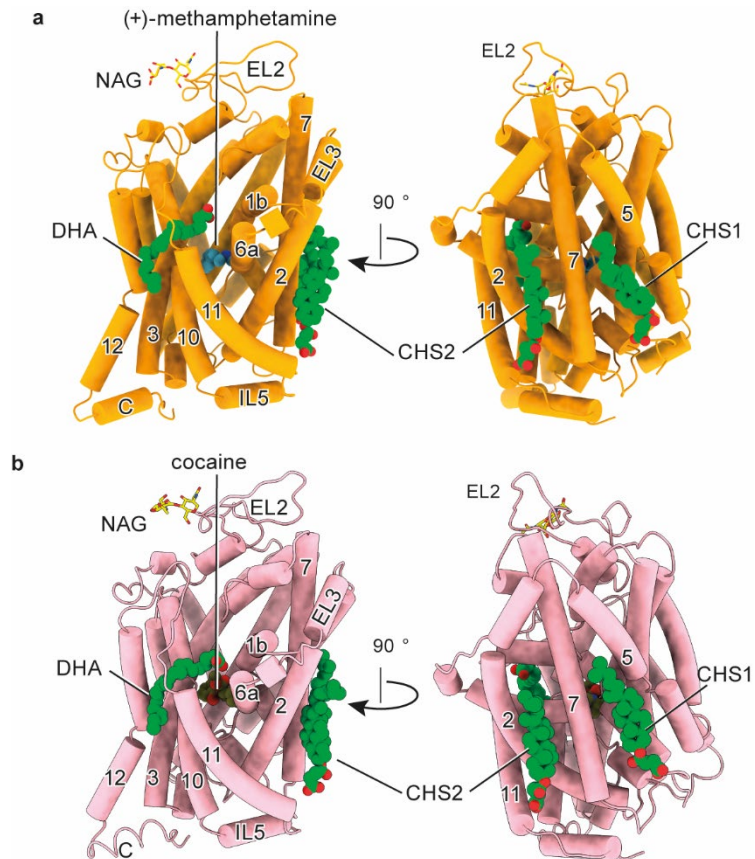

896 **Fig. 2** The cryo-EM structure of nSERT in complex with (+)-methamphetamine or  
897 **cocaine, respectively.** **a** Overall structure of the (+)-methamphetamine complex in the  
898 outward-open conformation, shown in cartoon representation. **b** Cartoon representation  
899 of the cocaine complex in the outward-occluded conformation. (+)-methamphetamine,  
900 cocaine, cholesteryl hemisuccinate (CHS), and docosahexaenoic acid (DHA) are shown  
901 in space-filling representations.

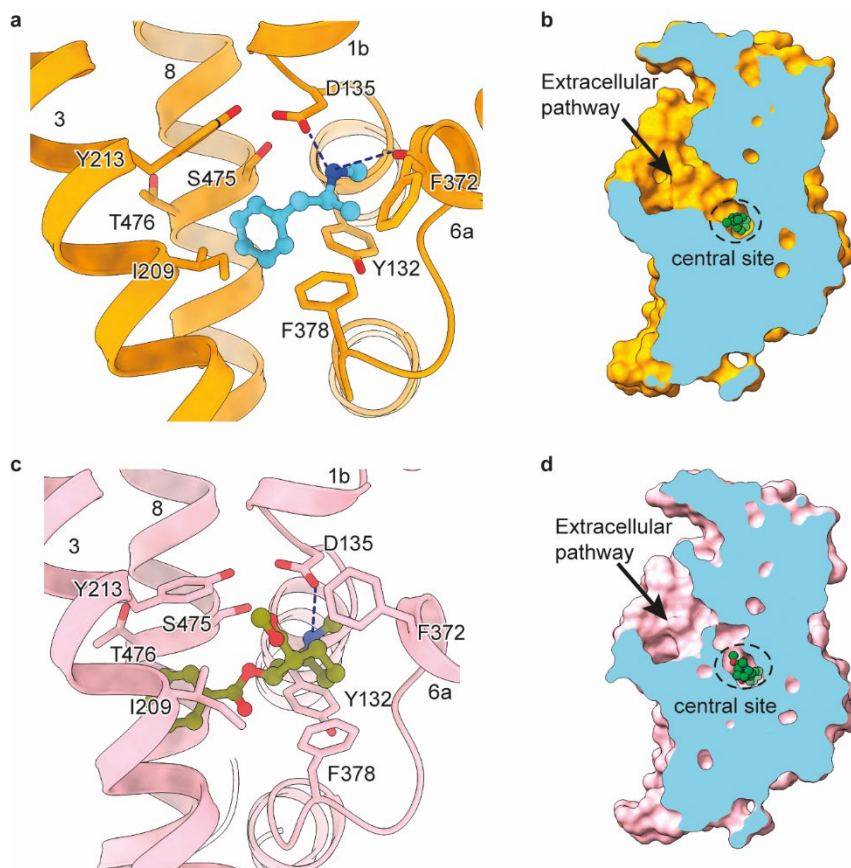

903 **Fig. 3 Ligands occupy the central site.** **a** Close-up view of (+)-methamphetamine in  
904 the binding pocket with hydrogen bonds shown as dashed lines. **b** Slice view of nSERT  
905 in complex with (+)-methamphetamine. **c** Cocaine interactions within the central  
906 binding site. A hydrogen bond between cocaine and D135 is indicated with a dashed  
907 line. **d** Slab views of the extracellular cavity of nSERT in complex with cocaine.

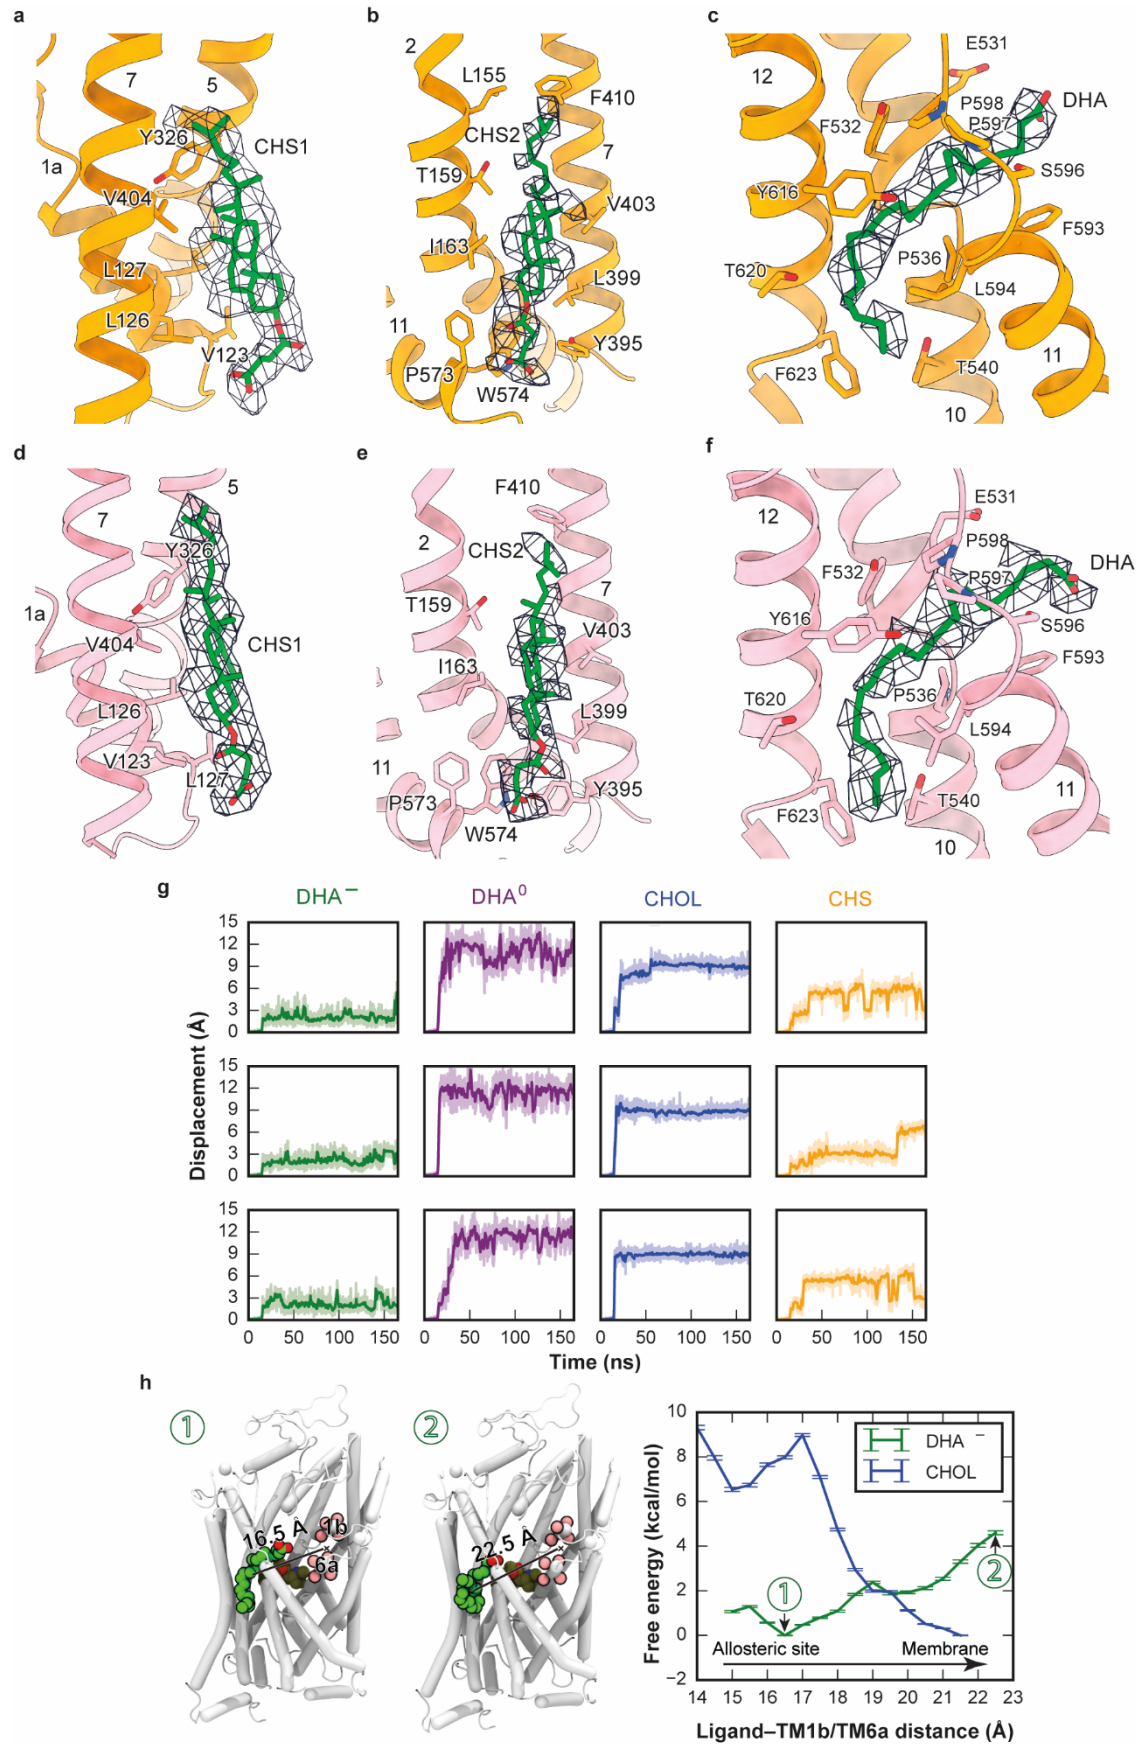

909 **Fig. 4 Cholesteryl hemisuccinate (CHS) and docosahexaenoic acid (DHA) binding**



910 **in SERT. a and d** Close-up views of CHS modeled at the junction of TM1, TM5, and  
911 TM7 interacting with multiple hydrophobic residues. **b and e**, CHS modeled at the  
912 junction of TM2, TM7, and TM11. **c and f**, DHA modeled at the allosteric site. **g** Time  
913 series of displacements of ligands modeled at the allosteric site during the MD  
914 simulation. DHA<sup>-</sup>, DHA<sup>0</sup>, CHOL, and CHS trajectories are plotted in green, purple,  
915 blue, and orange, respectively, and are shown for three independent simulations in each  
916 case. Plots are smoothed using a sliding window of 1 ns. **h** Free energy profiles of DHA<sup>-</sup>  
917 and CHOL binding to the allosteric site along the ligand–TM1b/TM6a distance, with  
918 molecular images showing DHA<sup>-</sup> in the allosteric site (left) or dissociated into the  
919 membrane (middle). The ligand–TM1b/TM6a distance is measured as the center-of-  
920 mass distance between heavy atoms in the ligand (shown in VDW representation) and  
921 C $\alpha$  atoms from TM1b and TM6a (residues 145–148 and 361–364, shown as pink  
922 spheres).
